# Supplementary material for: An individualized mosaic of maternal microbial strains is transmitted to the infant gut microbial community
Source: R Soc Open Sci. 2020 Apr 15;7(4):192200. doi: 10.1098/rsos.192200 (PMC7211887; doi:10.1098/rsos.192200)
Supplement: Table S4. WSS results on the Shao et al., study for caesarean section birth. [file rsos192200supp4.xlsx]

## Sheet: Sheet1
S4 Table: WSS results on the Shao et al., study for caesarean section birth. All pairwise comparisons were performed between mother vs. infants (at 4-, 7-, 21-day, and infancy) after caesarean section birth. The resultant WSS scores are represented as a numerical value along with the data bar graphs. The WSS scores that were above the cut-off (CO) values are in red. NA = Sample was not available …
		Fecal sample from each mother vs.
Species	Individual ID	Infant - at 4 day after birth	Infant - at 7 day after birth	Infant - at 21 day after birth	Infant - Infancy
Bacteroides cellulosilyticus (CO: 98.2)	A02110	NS	NS	NS	100
Barnesiella intestinihominis (CO: 99.3)	A02110	NS	NS	NS	100
Bacteroides 2-1-16 (CO: 98.1)	B00075	100	100	NS	NA
	A02110	NS	NS	NS	100
Bacteroides ovatus (CO: 91.7)	B01772	NS	NS	NS	99
Bacteroides vulgatus (CO: 95.1)	BBS0070	99	NS	NA	NA
	B01772	NS	NS	NS	8
Bifidobacterium longum (CO: NA)	B00075	99	99	98	NA
	BBS0070	74	74	NA	NA
	A02110	NS	NS	NS	82
	B01772	NS	84	84	99
Collinsella aerofaciens (CO: 79.2)	B00075	NS	100	100	NA
Escherichia coli (CO: NA)	A02064	NS	NS	NS	1
	A02110	NS	NS	NS	25
	A02138	NS	NS	NS	95
Parabacteroides sp D13 (CO: 99)	A02110	NS	NS	NS	100
