# Supplementary material for: An individualized mosaic of maternal microbial strains is transmitted to the infant gut microbial community
Source: R Soc Open Sci. 2020 Apr 15;7(4):192200. doi: 10.1098/rsos.192200 (PMC7211887; doi:10.1098/rsos.192200)
Supplement: Table S6. WSS results between the human fecal sample and the gnotobiotic mouse. [file rsos192200supp6.xlsx]

## Sheet: Sheet1
S6 Table: WSS results between the human fecal sample and the gnotobiotic mouse. All pairwise comparisons were conducted between each donor feces vs. post-FMT dam (BRD) and their F1 progenies (F1-1, F1-2, F1-3, and F1-4). The resultant WSS scores are represented as a numerical value along with the data bar graphs. The WSS scores that were above the cut-off (CO) values are in red. CO: NA = no cut-o…
		Donor 1 feces vs.				Donor 2 feces vs.				Donor 3 feces vs.				Donor 4 feces vs.				Donor 5 feces vs.
Species	Sample	Post FMT samples		Species	Sample	Post FMT samples		Species	Sample	Post FMT samples		Species	Sample	Post FMT samples		Species	Sample	Post FMT samples
Alistipes_onderdonkii (CO: 97.4)	HuM1 BRD	100		Alistipes_putredinis (CO: 93.9)	HuM2 BRD	100		Bacteroides_ovatus (CO: 91.7)	HuM3 BRD	99		Akkermansia muciniphila (CO: 99.8)	HuM4 BRD	100		Alistipes putredinis (CO: 93.9)	HuM5 BRD	100
	HuM1 F1-1	100			HuM2 F1-1	43			HuM3 F1-1	93			HuM4 F1-1	100			HuM5 F1-1	100
	HuM1 F1-2	100			HuM2 F1-2	43			HuM3 F1-2	60			HuM4 F1-2	100			HuM5 F1-2	100
	HuM1 F1-3	100			HuM2 F1-3	43			HuM3 F1-3	95			HuM4 F1-3	100			HuM5 F1-3	100
	HuM1 F1-4	100			HuM2 F1-4	43			HuM3 F1-4	98			HuM4 F1-4	100			HuM5 F1-4	100
Bacteroides_ovatus (CO: 91.7)	HuM1 BRD	99		Alistipes_shahii (CO: 92)	HuM2 BRD	99		Bacteroides_uniformis (CO: 97.8)	HuM3 BRD	100		Bacteroides ovatus (CO: 91.7)	HuM4 BRD	7		Alistipes onderdonkii (CO: 97.4)	HuM5 F1-3	100
	HuM1 F1-1	98			HuM2 F1-2	22			HuM3 F1-1	100			HuM4 F1-1	11
	HuM1 F1-2	99			HuM2 F1-4	46			HuM3 F1-2	100			HuM4 F1-2	7		Bacteroides cellulosilyticus (CO: 98.2)	HuM5 BRD	68
	HuM1 F1-3	99							HuM3 F1-3	100			HuM4 F1-3	13			HuM5 F1-1	72
	HuM1 F1-4	99		Bacteroides_massiliensis (CO: 97.7)	HuM2 BRD	99			HuM3 F1-4	100			HuM4 F1-4	6			HuM5 F1-2	94
																	HuM5 F1-3	96
Bacteroides_massiliensis (CO: 97.7)	HuM1 BRD	99		Bacteroides_vulgatus (CO: 95.1)	HuM2 BRD	99		Bacteroides_sp_1_1_6 (CO: 97.4)	HuM3 BRD	98		Bacteroides uniformis (CO: 97.8)	HuM4 BRD	100			HuM5 F1-4	91
	HuM1 F1-1	99			HuM2 F1-1	97			HuM3 F1-1	99			HuM4 F1-1	100
	HuM1 F1-2	99			HuM2 F1-2	95			HuM3 F1-2	98			HuM4 F1-2	100		Bacteroides ovatus (CO: 91.7)	HuM5 BRD	98
	HuM1 F1-3	99			HuM2 F1-3	95			HuM3 F1-3	99			HuM4 F1-3	100			HuM5 F1-2	98
	HuM1 F1-4	99			HuM2 F1-4	83			HuM3 F1-4	99			HuM4 F1-4	100			HuM5 F1-3	97
Bacteroides_vulgatus (CO: 95.1)	HuM1 BRD	99		Bacteroides_stercoris (CO: 97.1)	HuM2 BRD	99		Bacteroides_sp_2_1_16 (CO: 97.4)	HuM3 BRD	100		Bacteroides cellulosilyticus (CO: 98.2)	HuM4 BRD	100		Bacteroides sp 1 1 6 (CO: 97.4)	HuM5 BRD	100
	HuM1 F1-1	99							HuM3 F1-1	100			HuM4 F1-1	100			HuM5 F1-1	100
	HuM1 F1-2	98		Bacteroides_uniformis (CO: 97.8)	HuM2 BRD	97			HuM3 F1-2	100			HuM4 F1-2	100			HuM5 F1-2	100
	HuM1 F1-3	98			HuM2 F1-1	99			HuM3 F1-3	100			HuM4 F1-3	100			HuM5 F1-3	100
	HuM1 F1-4	97			HuM2 F1-2	99			HuM3 F1-4	100			HuM4 F1-4	100			HuM5 F1-4	100
Bacteroides_stercoris (CO: 97.1)	HuM1 BRD	99		Parabacteroides_merdae (CO: 98.1)	HuM2 BRD	98		Bacteroides_stercoris (CO: 97.1)	HuM3 BRD	100		Parabacteroides sp D13 (CO: 99)	HuM4 BRD	100		Bacteroides uniformis (CO: 97.8)	HuM5 BRD	99
	HuM1 F1-1	99							HuM3 F1-4	100			HuM4 F1-1	100			HuM5 F1-1	53
	HuM1 F1-2	99		Barnesiella_intestinihominis (CO: 99.3)	HuM2 BRD	100							HuM4 F1-2	100			HuM5 F1-2	29
	HuM1 F1-3	99			HuM2 F1-2	100		Ruminococcus_sp_5_1 (CO: NA)	HuM3 BRD	51			HuM4 F1-3	100			HuM5 F1-3	83
	HuM1 F1-4	99			HuM2 F1-3	100							HuM4 F1-4	100			HuM5 F1-4	57
					HuM2 F1-4	100		Bacteroides_vulgatus (CO: 95.1)	HuM3 F1-2	96
Bacteroides_uniformis (CO: 97.8)	HuM1 BRD	86										Bacteroides stercoris (CO: 97.1)	HuM4 BRD	100		Parabacteroides sp. D13 (CO: 99)	HuM5 BRD	100
	HuM1 F1-1	39		Bacteroides_coprocola (CO: 67)	HuM2 BRD	99							HuM4 F1-1	99			HuM5 F1-1	100
	HuM1 F1-2	49			HuM2 F1-1	99							HuM4 F1-2	100			HuM5 F1-2	100
	HuM1 F1-3	39			HuM2 F1-2	98							HuM4 F1-3	100			HuM5 F1-3	100
	HuM1 F1-4	39			HuM2 F1-3	97							HuM4 F1-4	100			HuM5 F1-4	100
					HuM2 F1-4	97
Parabacteroides_merdae (CO: 98.1)	HuM1 BRD	83										Alistipes onderdonkii (CO: 97.4)	HuM4 BRD	100		Ruminococcus torques ATCC (CO: 96.6)	HuM5 F1-2	99
	HuM1 F1-1	77		Parabacteroides_sp_D13 (CO: 99)	HuM2 BRD	93							HuM4 F1-1	100			HuM5 F1-3	99
	HuM1 F1-2	75			HuM2 F1-1	99							HuM4 F1-2	100			HuM5 F1-4	100
	HuM1 F1-3	79			HuM2 F1-2	25							HuM4 F1-3	100
	HuM1 F1-4	77			HuM2 F1-3	24							HuM4 F1-4	100
					HuM2 F1-4	25
Ruminococcus_sp_5_1 (CO: NA)	HuM1 BRD	95										Barnesiella intestinihominis (CO: 99.3)	HuM4 BRD	100
													HuM4 F1-1	100
													HuM4 F1-2	100
												Erysipelotrichaceae bacterium (CO: NA)	HuM4 BRD	99
													HuM4 F1-1	99
													HuM4 F1-2	99
													HuM4 F1-4	98
												Ruminococcus torques ATCC (CO: 96.6)	HuM4 F1-1	96
													HuM4 F1-2	98
													HuM4 F1-3	94
