# Supplementary material for: An individualized mosaic of maternal microbial strains is transmitted to the infant gut microbial community
Source: R Soc Open Sci. 2020 Apr 15;7(4):192200. doi: 10.1098/rsos.192200 (PMC7211887; doi:10.1098/rsos.192200)
Supplement: Table S8. Taxonomic profile. [file rsos192200supp8.xlsx]

## Sheet: Sheet1
S8 Table: Taxonomic profile. Microbial community composition was profiled at the species level for the post-FMT gnotobiotic mouse data set. The number shown in the table represents the "estimated number of reads from the clade" obtained using MetaPhlAn2 (version 2.7.62).
#SampleID	D1Feces	HuM1 BRD	HuM1 F1-1	HuM1 F1-2	HuM1 F1-3	HuM1 F1-4	D2Feces	HuM2 BRD	HuM2 F1-1	HuM2 F1-2	HuM2 F1-3	HuM2 F1-4	D3Feces	HuM3 BRD	HuM3 F1-1	HuM3 F1-2	HuM3 F1-3	HuM3 F1-4	D4Feces	HuM4 BRD	HuM4 F1-1	HuM4 F1-2	HuM4 F1-3	HuM4 F1-4	D5Feces	HuM5 BRD	HuM5 F1-1	HuM5 F1-2	HuM5 F1-3	HuM5 F1-4
Bacteroides_stercoris	206149	294873	66854	148290	114856	84185	197641	213038	131	0	0	77	2803713	475646	39510	0	28725	190986	3632472	5276827	960765	1074040	1383867	153630	0	0	0	0	0	0
Faecalibacterium_prausnitzii	816494	0	0	0	0	0	11341	131273	0	0	0	0	299091	223566	0	0	0	0	1011634	472306	0	0	0	0	564572	0	0	0	0	0
Parabacteroides_unclassified	0	0	0	0	0	0	0	80919	156610	460889	237113	412907	0	1322391	254507	323989	108347	270654	1211256	1532479	435611	508547	335233	341395	155311	434114	60729	21940	86460	63292
Bacteroides_uniformis	375428	2852797	4662224	3158450	3821737	4861276	184720	267557	109920	72425	14005	12111	422545	985755	1321080	1367302	695274	1291543	1012017	2487119	509815	508486	637773	643365	355355	2747937	402185	369138	511101	469109
Bacteroides_ovatus	661221	4776620	3749612	3483374	2756676	3089534	2721	17870	62338	95770	860708	32758	12222	46	0	0	91	0	1434398	34832	60115	13047	76247	6908	1123856	474000	93244	163515	95042	65359
Akkermansia_muciniphila	4558	24869	18468	45838	23765	19615	11458	164871	91861	211835	72643	163912	0	0	192849	195404	145058	195399	547791	1946830	299777	329833	532691	231093	0	0	0	0	0	0
Ruminococcus_sp_5_1_39BFAA	228100	0	0	0	0	0	129129	0	0	0	0	0	661727	390493	0	0	0	0	561538	0	0	0	0	0	0	0	0	0	0	0
Bifidobacterium_longum	0	0	0	0	0	0	0	0	0	0	0	0	22361	0	0	0	0	0	285272	19834	0	0	0	559	42744	0	0	0	0	0
Eubacterium_hallii	50433	0	0	0	0	0	106349	153	0	0	0	0	98283	0	0	0	0	0	352952	0	0	0	0	0	0	0	0	0	0	0
Subdoligranulum_unclassified	46658	21649	14557	28741	21276	25755	637158	97795	84357	53003	14557	25265	64574	351637	215745	93315	203428	206787	388725	308446	37699	150051	111605	27621	41805	637061	99661	160129	176926	370649
Bacteroides_intestinalis	0	0	0	0	0	0	0	0	0	0	0	0	0	0	0	0	0	0	626097	2844782	1483062	1088379	609165	2417030	339222	4088087	1007713	1092153	1016411	1349675
C2likevirus_unclassified	3	1	0	0	0	0	17	0	0	0	0	0	0	0	0	0	0	0	1672	0	0	0	0	0	3	0	0	0	0	0
Lachnospiraceae_bacterium_5_1_63FAA	8841	0	0	0	0	0	2537	0	0	0	0	0	7702	0	0	0	0	0	218497	30919	0	0	0	0	0	0	0	0	0	0
Barnesiella_intestinihominis	0	0	0	0	0	0	172377	188181	42650	138205	86750	101554	0	0	0	0	0	0	212488	313213	56847	65124	48426	47228	0	0	0	0	0	0
Ruminococcus_gnavus	18713	290	0	0	0	0	1301	0	0	0	0	0	176078	7121	0	0	0	0	167215	10296	0	0	0	0	10199	319406	0	0	0	0
Ruminococcus_torques	114520	61209	13821	31592	15796	38502	789794	33566	6911	17770	7898	25668	251747	67132	2962	1974	3949	4936	138214	74043	58247	85890	57260	8885	220155	132290	28630	51337	84903	108597
Clostridium_bolteae	5753	1124608	1094071	838144	961937	1242580	143109	160073	343502	505526	272306	378610	98200	425436	38286	217607	4091	42709	245406	560966	11553	14179	8631	20718	76259	345586	46631	5001	36509	1326
Alistipes_onderdonkii	194504	83688	89765	102484	90861	73917	20012	2853	1462	2144	1660	0	10235	26388	1373	3132	1854	1351	131720	101858	63591	88955	61749	67682	181870	45705	5691	23814	40306	8191
Clostridium_sp_KLE_1755	0	765136	720618	541393	633155	785780	103218	101627	192791	255192	91498	203892	0	301346	0	0	0	0	181487	1955527	133120	284199	452014	250717	0	0	0	0	0	0
Ruminococcus_obeum	13436	0	0	0	0	0	203719	2380	893	226	75	1849	113917	0	0	0	0	0	100582	810	0	0	0	0	0	0	0	0	0	0
Eubacterium_sp_3_1_31	11775	5808	3312	2355	30	671	5637	7007	6855	17357	7049	2678	901	0	61010	0	0	76163	84936	892802	85139	88453	20559	79576	921	209804	55647	103289	176199	286480
Parabacteroides_goldsteinii	0	0	0	0	0	0	0	0	0	0	0	0	0	0	0	0	0	0	132622	259761	69638	60594	42987	60594	35355	1401351	366101	460689	493931	422474
Lachnospiraceae_bacterium_2_1_58FAA	0	0	0	0	0	0	0	0	0	0	0	0	30218	1017	0	0	0	0	63523	6187	0	0	0	0	0	0	0	0	0	0
Eubacterium_ramulus	700	0	0	0	0	0	0	0	0	0	0	0	151257	0	0	0	0	0	62630	0	0	0	0	0	0	0	0	0	0	0
Eubacterium_eligens	199341	0	0	0	0	0	0	0	0	0	0	0	297	0	0	0	0	0	36100	0	0	0	0	0	0	0	0	0	0	0
Coprococcus_catus	30694	0	0	0	0	0	0	0	0	0	0	0	20477	0	0	0	0	0	56058	0	0	0	0	0	0	0	0	0	0	0
Oscillibacter_sp_KLE_1728	182579	0	0	48688	36516	24344	0	0	0	0	0	0	0	0	0	0	0	0	48688	0	0	0	0	0	0	0	0	0	0	0
Dorea_longicatena	76437	0	0	0	0	0	45380	0	0	0	0	0	100256	0	0	0	0	0	36097	0	0	0	0	0	4653	0	0	0	0	0
Parabacteroides_distasonis	0	0	0	0	0	0	21530	143936	221678	287480	296336	255449	5610	113706	26459	205062	66908	32964	54057	75956	20267	21338	14504	9932	0	0	0	0	0	0
Dorea_unclassified	0	1194	1057	0	352	1367	0	0	0	436	785	0	0	0	0	0	0	0	43902	2607	0	0	0	0	0	0	0	0	0	0
Coprococcus_comes	66879	0	0	0	0	0	490575	0	0	0	0	0	94094	0	0	0	0	0	31406	0	0	0	0	0	0	0	0	0	0	0
Oscillibacter_unclassified	63080	52469	51232	0	24637	25643	81578	33702	3289	24811	9036	9180	6696	33500	22848	0	5096	27082	36723	28605	0	18466	24649	11435	108555	46115	0	0	0	0
Roseburia_unclassified	0	0	0	0	0	0	15875	0	0	0	0	0	0	68525	0	0	0	0	35068	0	0	0	0	0	0	1426	495	1096	790	451
Streptococcus_salivarius	1835	0	0	0	0	0	127105	0	0	0	0	0	2260	0	0	0	0	0	17231	0	0	0	0	0	13877	0	0	0	0	0
Subdoligranulum_sp_4_3_54A2FAA	0	0	0	0	0	0	0	0	0	0	0	45259	0	130715	0	0	0	0	31029	100649	0	0	0	0	0	136756	0	0	0	0
Coprobacillus_unclassified	0	7106	1493	3237	3223	3938	8899	3061	2173	0	1590	3066	58	0	1546	0	0	2471	26645	0	0	0	0	0	0	0	0	0	0	0
Eggerthella_sp_1_3_56FAA	14396	0	0	0	0	0	0	0	0	0	0	0	0	0	0	0	0	0	24154	18562	0	0	0	0	0	0	0	0	0	0
Escherichia_coli	0	386	0	0	0	0	0	92542	0	0	0	0	0	8945	22067	1569	9989	809	33490	483104	50649	26662	87060	4780	19830	73513	14302	21912	27316	19178
Dorea_formicigenerans	10532	0	0	0	0	0	39791	3212	0	0	0	0	52725	0	0	0	0	0	21259	0	0	0	0	0	1717	0	0	0	0	0
Clostridiales_bacterium_1_7_47FAA	2210	9131	34254	33516	31275	30390	2482	7528	11372	7008	6153	9526	0	16663	2550	6263	2084	3211	29379	100095	11563	3207	4505	7310	1325	213589	10018	7894	19124	7194
Clostridium_bartlettii	20237	14556	0	0	0	0	0	0	0	0	0	0	5870	0	0	0	0	0	12991	0	0	0	0	0	855	0	0	0	0	0
Anaerostipes_hadrus	22391	0	0	0	0	0	1957	0	0	0	0	0	7595	0	0	0	0	0	10422	806	0	0	0	0	0	0	0	0	0	0
Eggerthella_unclassified	10414	563	245	73	97	422	18373	0	127	363	194	304	1165	88033	1890	11551	10017	1020	12187	14559	9744	7907	10288	8989	2730	82157	15105	20205	26969	19427
Clostridium_leptum	0	0	0	0	0	0	9368	0	0	0	0	0	0	0	0	0	0	0	11676	362	68	0	0	0	1292	0	0	0	0	0
Lachnospiraceae_bacterium_1_4_56FAA	3779	0	0	0	0	0	1953	28	0	0	0	0	9126	0	0	0	0	0	10906	73606	0	0	956	0	3040	71029	0	0	0	0
Bacteroides_xylanisolvens	151851	1631542	1411125	1286858	1020039	1146507	1168	334271	235460	464604	43058	83533	0	4822	37428	83921	7776	11395	19114	863583	327153	246927	259226	365140	8768	829	0	0	448	818
Peptostreptococcaceae_noname_unclassified	9344	0	2471	2013	3240	0	0	0	0	0	0	0	134226	4870	1315	0	2629	0	9408	0	0	0	0	0	4321	0	0	0	0	0
Alistipes_unclassified	0	0	0	0	0	0	0	0	0	0	0	0	7878	113107	63360	16316	31313	66355	9648	2566	3521	0	0	0	0	0	0	0	0	0
Veillonella_unclassified	532	0	0	0	0	0	1242	0	0	0	0	0	914	0	0	0	0	0	5755	0	0	0	0	0	2493	0	0	0	0	0
Streptococcus_parasanguinis	987	0	0	0	0	0	14029	0	0	0	0	0	0	0	0	0	0	0	5681	0	0	0	0	0	4836	0	0	0	0	0
Clostridium_nexile	0	0	0	0	0	0	0	0	0	0	0	0	0	0	0	0	0	0	20178	842839	0	0	0	0	0	0	0	0	0	0
Holdemania_unclassified	3779	0	0	0	0	0	0	0	0	0	0	0	699	9260	3690	0	553	1977	9501	0	0	0	0	0	4741	0	12241	0	0	0
Lachnospiraceae_bacterium_7_1_58FAA	14412	6980	6008	6246	7118	8345	12926	8160	6138	11001	17671	12287	1425	19076	11229	7982	5239	5296	13719	16152	2679	4197	4102	2933	10680	18650	11358	10093	17431	21692
Adlercreutzia_equolifaciens	7241	1937	1639	1291	1634	2464	6523	3303	2735	5154	1567	3773	0	0	15512	840	3999	13046	6671	64356	15770	15263	19489	5987	0	0	0	0	0	0
Clostridium_symbiosum	2681	39642	79681	84997	150201	110423	1386	32524	57146	104194	46621	81917	0	558156	89754	179267	108956	85939	10876	554084	155001	132046	165176	120044	4824	353195	117498	134618	187619	148475
Anaerotruncus_colihominis	0	0	0	0	0	0	4825	197	1406	1354	80	2037	0	13750	1485	16776	8342	1694	7791	6118	0	1139	0	422	10020	19784	8744	7896	11041	8846
Eggerthella_lenta	1026	0	0	0	0	0	940	0	0	0	0	0	0	29669	136	729	4919	0	6444	6346	914	772	1036	1158	0	897	164	1202	816	737
Ruminococcaceae_bacterium_D16	84	0	0	0	0	0	109	0	0	0	0	0	1559	0	0	0	0	0	4858	0	0	0	0	0	0	0	0	0	0	0
Blautia_producta	0	27913	45151	31314	38379	65649	11302	336460	538544	1130763	535180	680927	0	96749	679369	98074	52382	563341	8621	309975	129073	100604	110250	114612	925	1818474	489135	662297	805283	733083
Saccharomyces_cerevisiae	909	0	0	0	0	0	0	0	0	0	0	0	1506	0	0	0	0	0	16063	0	0	0	0	0	6425	0	0	0	0	0
Turicibacter_unclassified	0	0	0	0	0	0	0	0	0	0	0	0	18142	0	0	0	0	0	3802	0	0	0	0	0	0	0	0	0	0	0
Desulfovibrio_desulfuricans	859	0	579	0	0	0	6060	0	0	845	0	0	0	0	0	0	0	0	4350	580	0	0	0	0	0	0	0	0	0	0
Flavonifractor_plautii	21877	5574	5996	5412	4874	5631	9561	5225	4756	9063	12866	10681	126	24865	13433	9590	4900	4348	4806	7558	735	4254	5520	2825	5480	11067	7865	9898	14893	15241
Streptococcus_australis	1003	0	0	0	0	0	1749	0	0	0	0	0	4266	0	0	0	0	0	2450	0	0	0	0	0	0	0	0	0	0	0
Lactococcus_lactis	6134	0	0	0	0	0	8873	0	0	0	0	0	0	0	0	0	0	0	2422	0	0	0	0	0	1966	0	0	0	0	0
Clostridium_hathewayi	3595	308065	573237	441737	569430	712876	2738	69536	57815	146744	55814	96969	87	534802	50685	29091	578	56238	5929	798895	317359	347264	386359	635373	1853	116765	21041	24699	28994	33311
Lachnospiraceae_bacterium_3_1_46FAA	2228	0	0	0	0	0	19770	0	0	0	0	0	6541	0	99	0	0	95	2576	150	0	48	946	0	162869	8245	4316	8793	12401	12699
Lachnospiraceae_bacterium_3_1_57FAA_CT1	0	0	0	0	0	0	797	8092	4332	63737	59572	114535	0	0	143205	13049	91379	273849	6316	14055	25165	19567	2583	16932	4948	180020	767	562	1687	9753
Streptococcus_thermophilus	831	0	0	0	0	0	30630	0	0	0	0	0	54042	0	0	0	0	0	1413	0	0	0	0	0	826	0	0	0	0	0
Haemophilus_parainfluenzae	681	0	0	0	0	0	0	0	0	0	0	0	8314	0	0	0	0	0	1595	0	0	0	0	0	5215	0	0	0	0	0
Clostridium_celatum	0	0	0	0	0	0	0	0	0	0	0	0	4449	0	0	0	0	0	2621	0	0	0	0	0	0	0	0	0	0	0
Anaerostipes_caccae	0	8911	11094	8764	11065	14397	0	742	709	479	0	351	0	166550	2966	3031	38505	4585	2217	217044	25392	29787	26562	38177	0	1855	11826	11685	14803	16406
Escherichia_unclassified	0	916	0	0	0	0	0	55822	0	0	0	0	0	0	12079	0	2869	0	2815	72698	0	14836	12547	43	5240	5964	3343	2683	9781	5205
Lactobacillus_casei_paracasei	0	0	0	0	0	0	0	0	0	0	0	0	0	0	0	0	0	0	1703	0	0	0	0	0	0	0	0	0	0	0
Pseudoflavonifractor_capillosus	46	47	0	0	0	0	47	0	0	0	0	0	0	0	0	0	0	0	2401	0	0	0	0	0	0	0	0	0	0	0
Lactobacillus_sanfranciscensis	0	0	0	0	0	0	0	0	0	0	0	0	0	0	0	0	0	0	596	0	0	0	0	0	0	0	0	0	0	0
Clostridium_asparagiforme	2799	22797	18317	19703	22106	24102	13694	16295	34215	43883	26038	34141	202	232452	15823	32018	22329	16996	2810	58051	24537	27427	25611	15127	0	0	19312	20066	29843	20780
Erysipelotrichaceae_bacterium_6_1_45	330	2243	0	0	0	7701	0	0	0	49	0	0	0	0	0	0	0	0	1829	37405	11100	14098	11355	48557	140	0	94	94	652	564
Veillonella_atypica	473	0	0	0	0	0	210	0	0	0	0	0	0	0	0	0	0	0	764	0	0	0	0	0	561	0	0	0	0	0
Anaerofustis_stercorihominis	0	0	96	150	0	296	0	0	0	0	0	0	0	0	0	0	0	0	695	15262	2644	4312	1650	3231	0	0	0	0	0	0
Streptococcus_mitis_oralis_pneumoniae	805	0	0	0	0	0	3782	0	0	0	0	0	1377	0	0	0	0	0	614	0	0	0	0	0	0	0	0	0	0	0
Turicibacter_sanguinis	0	0	0	0	0	0	0	0	0	0	0	0	366	0	0	0	0	0	686	0	0	0	0	0	0	0	0	0	0	0
Delftia_acidovorans	0	0	0	0	0	0	0	0	0	152	0	0	229	0	0	0	0	0	1452	0	0	0	0	0	0	0	0	0	0	0
Veillonella_parvula	0	0	0	0	0	0	300	0	0	0	0	0	967	0	0	0	0	0	360	0	0	0	0	0	372	0	0	0	0	0
Erysipelotrichaceae_bacterium_21_3	487	4543	5197	6057	5600	2837	1705	25406	14206	31703	14228	15782	0	0	0	0	0	0	738	20184	53	0	0	0	135	47047	6594	6585	1982	3515
Streptococcus_vestibularis	0	0	0	0	0	0	5896	0	0	0	0	0	0	0	0	0	0	0	322	0	0	0	0	0	0	0	0	0	0	0
Streptococcus_infantis	672	0	0	0	0	0	849	0	0	0	0	0	203	0	0	0	0	0	276	0	0	0	0	0	77	0	0	0	0	0
Anaerotruncus_unclassified	0	0	0	0	0	0	20024	0	0	0	0	0	0	0	4599	0	0	0	523	0	0	0	0	0	0	0	0	0	0	0
Clostridium_citroniae	2960	2277	1951	2855	2870	3459	3562	1196	1717	3029	1084	3759	955	35166	3592	1277	1203	2723	822	6006	820	533	1122	1375	2557	16334	5058	1220	5323	1599
Erysipelotrichaceae_bacterium_2_2_44A	0	6189	324	1980	379	12445	0	0	0	0	0	0	0	0	0	0	403	0	545	16753	3242	1500	3338	12735	0	0	0	0	0	0
Clostridium_butyricum	0	0	0	0	0	0	0	0	0	0	0	0	0	0	0	0	0	0	474	191	0	0	0	0	0	0	0	0	0	0
Granulicatella_unclassified	77	0	0	0	0	0	1151	0	0	0	0	0	238	0	0	0	0	0	166	0	0	0	0	0	0	0	0	0	0	0
Clostridium_clostridioforme	0	24323	12637	12221	10129	9363	0	28157	76458	170494	54183	108433	0	475294	255079	454677	235582	150319	504	343538	209986	144398	59742	103854	2658	3480	92258	239127	89479	207028
Actinomyces_graevenitzii	149	0	0	0	0	0	31	0	0	0	0	0	0	0	0	0	0	0	90	0	0	0	0	0	233	0	0	0	0	0
Rothia_mucilaginosa	30	0	0	0	0	0	764	0	0	0	0	0	242	0	0	0	0	0	62	0	0	0	0	0	262	0	0	0	0	0
Finegoldia_magna	0	0	0	0	0	0	0	0	0	0	0	0	0	0	0	0	0	0	44	0	0	0	0	0	0	0	0	0	0	0
Gemella_sanguinis	0	0	0	0	0	0	0	0	0	0	0	0	302	0	0	0	0	0	37	0	0	0	0	0	0	0	0	0	0	0
Lachnospiraceae_bacterium_5_1_57FAA	202	2617	2248	1604	1766	3503	0	0	285	0	0	363	0	26599	357	7650	3331	1812	67	6375	0	0	0	0	354	32907	3080	3804	5495	3850
Clostridium_scindens	111	612	147	0	110	110	0	0	0	245	0	0	0	1640	0	257	0	144	37	1693	0	36	0	0	0	2421	111	472	475	888
Delftia_unclassified	0	0	0	0	0	0	0	0	0	1623	0	0	2155	0	0	0	0	0	69	0	0	0	0	0	0	0	0	0	0	0
Meiothermus_silvanus	0	0	0	0	0	0	0	0	0	0	0	0	183	0	0	0	0	0	31	0	0	0	0	0	0	0	0	0	0	0
Streptococcus_sanguinis	325	0	0	0	0	0	8142	0	0	0	0	0	0	0	0	0	0	0	20	0	0	0	0	0	521	0	0	0	0	0
Coprobacillus_sp_29_1	0	0	0	0	0	0	0	0	0	160723	0	0	0	0	0	0	0	0	0	540615	423725	336058	379892	306836	0	1475734	263002	306836	350669	482170
Coprobacillus_sp_D6	0	0	0	0	0	0	0	0	0	0	0	0	0	0	0	0	0	0	0	166077	41519	0	0	83038	0	0	0	0	0	0
Clostridium_difficile	0	56806	0	0	0	72071	0	0	0	0	0	0	0	0	0	0	0	0	0	103578	0	0	0	0	0	0	0	0	0	0
Holdemania_sp_AP2	0	0	0	0	0	0	0	0	0	0	0	0	0	0	0	0	0	0	0	89831	25206	25351	28950	26782	0	51302	0	17930	22612	24469
Lachnospiraceae_bacterium_1_1_57FAA	0	0	0	0	0	0	0	0	0	0	2828	0	33873	10039	0	0	0	0	0	67746	0	11291	5646	11291	28228	101619	45164	0	39519	5646
Clostridiaceae_bacterium_JC118	0	0	0	0	0	0	405	12071	5152	10983	6695	0	202	86346	2358	26750	3899	5145	0	81579	25079	19075	26724	20536	1148	0	0	0	0	0
Clostridium_spiroforme	0	0	0	0	0	0	0	0	0	0	0	0	0	0	0	0	0	0	0	28342	0	0	0	0	0	0	0	0	0	0
Oscillibacter_sp_KLE_1745	0	0	0	0	0	0	0	0	0	0	0	0	0	0	0	0	0	0	0	29265	29265	0	0	0	0	0	0	0	0	0
Clostridium_hylemonae	0	0	0	0	0	0	0	0	2565	7868	1063	3745	0	39456	23957	2664	87910	20813	0	1825	616	168	1115	438	0	0	35735	48083	71132	77384
Enterococcus_avium	0	81	0	0	0	0	0	0	0	0	0	0	0	404	0	14894	0	0	0	1982	0	0	0	0	0	0	0	0	0	0
Pantoea_unclassified	0	0	0	0	0	0	0	0	0	0	0	0	0	0	0	0	0	0	0	1361	0	0	0	0	0	0	0	0	0	0
Bacteroides_cellulosilyticus	0	0	0	0	0	0	36463	1482899	908621	2220781	1925124	3182595	12378	9688665	2088255	735385	2190292	2651904	0	505	0	0	799	0	117184	7555	7751	105009	116719	92193
Clostridium_perfringens	0	0	0	0	0	0	0	0	0	0	0	0	0	0	0	0	0	0	0	199	0	0	0	0	0	0	0	0	0	0
Anaerostipes_unclassified	0	1197	1206	466	1255	0	0	325	0	0	244	3	0	1672	0	121	0	0	0	0	628	1327	478	720	2335	555690	37195	54998	67972	49013
Lachnospiraceae_bacterium_8_1_57FAA	0	0	3158	0	0	0	0	0	4224	0	0	0	0	0	6026	0	0	2739	0	0	0	0	0	7683	0	0	0	0	0	0
Bacteroides_thetaiotaomicron	0	0	0	0	0	0	6812	524919	259280	322794	336905	396530	103278	2697483	533621	900866	374564	615934	0	0	0	0	0	0	404786	1016012	217795	141909	303823	134977
Alistipes_putredinis	0	0	0	0	0	0	180835	258050	241630	379873	213800	296954	0	0	0	0	0	0	0	0	0	0	0	0	272860	271064	71922	88620	104856	89124
Bilophila_unclassified	59470	148507	125596	91784	86320	101660	4679	108941	66708	95752	59059	73367	15000	351835	61469	79698	53327	61138	0	0	0	0	0	0	33132	271532	73207	74492	99555	89016
Bacteroides_salyersiae	0	0	0	0	0	0	0	0	0	0	0	0	0	0	0	0	0	0	0	0	0	0	0	0	135368	237065	101807	148530	156303	151657
Odoribacter_splanchnicus	0	0	0	0	0	0	21625	67797	38488	55388	0	58522	17415	65306	0	0	0	0	0	0	0	0	0	0	113591	72639	22035	22411	24896	22150
Bacteroides_vulgatus	504774	132655	103941	133703	126989	175449	87725	133698	87051	170956	64866	40529	351634	5875	2180	9262	1161	3729	0	0	0	0	0	0	674106	78598	15808	4368	8901	7363
Alistipes_shahii	0	0	0	0	0	0	73024	39197	16452	7123	9218	11238	0	2010	0	453	276	62	0	0	0	0	0	0	97711	57333	9764	8902	16657	12454
Erysipelotrichaceae_bacterium_5_2_54FAA	0	0	0	0	0	0	0	0	0	0	0	0	0	0	0	0	0	0	0	0	0	0	0	0	194	47751	11010	22077	33485	57180
Bilophila_wadsworthia	1919	5320	5258	3183	2975	3318	39	303	0	226	0	0	3380	84833	13527	22465	12806	11984	0	0	0	0	0	0	6359	58841	681	15324	877	4218
Clostridium_ramosum	0	2260	0	478	522	967	2445	243	0	0	0	40	0	0	0	0	0	307	0	0	0	0	0	0	0	16643	31608	42446	35567	49652
Gordonibacter_pamelaeae	2937	2324	1190	1263	1455	2365	13399	826	1754	4599	2141	2184	0	13319	4575	1881	6054	3873	0	0	0	0	0	0	0	14106	6791	7804	10109	6842
Odoribacter_unclassified	0	0	0	0	0	0	0	0	0	0	0	0	0	0	3498	0	0	0	0	0	0	0	0	0	0	15559	6126	21351	11805	15613
Enterococcus_dispar	0	0	0	0	0	0	0	0	0	0	0	0	0	0	0	0	0	0	0	0	0	0	0	0	0	4949	0	0	0	0
Coprobacter_fastidiosus	0	0	0	0	0	0	706	0	9314	0	0	0	0	0	0	0	0	0	0	0	0	0	0	0	1694	2985	704	0	971	1710
Alistipes_finegoldii	7459	2900	3255	4815	3503	2414	25615	8422	3611	4155	2598	5002	258	894	0	0	0	0	0	0	0	0	0	0	1974	2271	0	0	0	0
Clostridium_methylpentosum	0	0	0	0	0	0	0	0	0	0	0	0	0	0	0	0	0	0	0	0	0	0	0	0	0	1032	0	0	0	0
Enterococcus_faecium	0	0	0	0	0	0	0	8024	0	0	0	0	0	0	0	0	0	0	0	0	0	0	0	0	0	811	0	0	0	0
Bacteroides_dorei	12054	0	9437	21571	0	0	38793	4987	14502	12317	51304	55860	47768	26429	12500	23354	14931	12678	0	0	0	0	0	0	668	855	0	0	43	0
Enterococcus_faecalis	0	0	0	0	0	0	0	2333	0	0	0	0	0	0	4084	817	2555	1185	0	0	0	0	0	0	0	0	0	677	752	164
Bacteroides_massiliensis	1949967	486294	291141	376982	235653	327437	171845	389602	0	0	0	0	0	0	0	0	0	0	0	0	0	0	0	0	2182913	0	0	0	0	0
Prevotella_copri	874899	0	0	0	0	0	0	0	0	0	0	0	0	0	0	0	0	0	0	0	0	0	0	0	0	0	0	0	0	0
Paraprevotella_unclassified	773587	106286	15885	21570	10567	22307	0	0	0	0	0	0	0	0	0	0	0	0	0	0	0	0	0	0	0	0	0	0	0	0
Parabacteroides_merdae	309114	216042	176088	85345	105324	175250	132172	83926	36193	25729	9311	34572	194718	93165	47238	0	0	29716	0	0	0	0	0	0	64486	0	0	0	0	0
Bacteroides_sp_2_1_22	294921	400250	400250	484513	400250	294921	0	0	0	0	0	0	0	2001249	1095421	758368	421316	0	0	0	0	0	0	0	0	0	0	0	0	0
Paraprevotella_clara	186731	36455	5971	5738	3626	8452	0	0	0	0	0	0	0	0	0	0	0	0	0	0	0	0	0	0	0	0	0	0	0	0
Roseburia_intestinalis	187351	179	0	0	0	0	54094	0	0	0	0	0	0	0	0	0	0	0	0	0	0	0	0	0	706666	0	0	0	0	0
Roseburia_inulinivorans	165600	0	0	0	0	0	459	2208	0	0	0	0	259783	0	0	0	0	0	0	0	0	0	0	0	31587	0	0	0	0	0
Ruminococcus_lactaris	98833	0	0	0	0	0	0	0	0	0	0	0	0	0	0	0	0	0	0	0	0	0	0	0	0	0	0	0	0	0
Roseburia_hominis	122609	2643	0	0	0	0	0	0	0	0	0	0	9765	0	0	0	0	0	0	0	0	0	0	0	0	0	0	0	0	0
Eubacterium_ventriosum	50347	0	0	0	0	0	0	0	0	0	0	0	35257	0	0	0	0	0	0	0	0	0	0	0	0	0	0	0	0	0
Collinsella_intestinalis	21859	4448	2472	2209	3666	4592	0	0	0	0	0	0	17574	33402	0	0	0	0	0	0	0	0	0	0	0	0	0	0	0	0
Burkholderiales_bacterium_1_1_47	27280	17745	18541	13155	12738	15266	3857	2642	4513	7123	7244	8296	5798	5657	199	0	100	160	0	0	0	0	0	0	40032	0	0	0	0	0
Eubacterium_biforme	17468	989	1521	727	451	1286	0	0	0	0	0	0	0	0	0	0	0	0	0	0	0	0	0	0	0	0	0	0	0	0
Dialister_invisus	10299	0	0	0	0	0	0	0	0	0	0	0	0	0	0	0	0	0	0	0	0	0	0	0	0	0	0	0	0	0
Parasutterella_excrementihominis	8714	4118	4584	2939	4251	3666	2895	1618	1510	1900	2656	2934	0	0	0	0	0	0	0	0	0	0	0	0	56872	0	0	0	0	0
Holdemania_filiformis	7469	26449	25738	15844	18303	18083	12628	16198	9046	14423	16823	15780	394	13819	3804	0	135	4844	0	0	0	0	0	0	11417	0	0	0	0	0
Streptococcus_anginosus	2290	0	0	0	0	0	0	0	0	0	0	0	0	0	0	0	0	0	0	0	0	0	0	0	0	0	0	0	0	0
Paraprevotella_xylaniphila	3154	1599	154	63	62	0	0	0	0	0	0	0	0	0	0	0	0	0	0	0	0	0	0	0	0	0	0	0	0	0
Acinetobacter_johnsonii	2636	0	0	0	0	0	0	0	0	0	0	0	0	0	0	0	0	0	0	0	0	0	0	0	0	0	0	0	0	0
Pseudomonas_unclassified	2970	0	0	0	0	0	0	0	0	0	0	0	0	0	0	0	0	0	0	0	0	0	0	0	0	0	0	0	0	0
Butyricicoccus_pullicaecorum	739	2844	0	0	0	0	0	0	0	0	0	0	0	0	0	0	0	0	0	0	0	0	0	0	0	0	0	0	0	0
Bacteroides_caccae	1002	0	0	0	0	0	96977	650318	291017	586577	319377	345472	0	0	0	0	0	0	0	0	0	0	0	0	0	0	0	0	0	0
Prevotella_bivia	339	0	0	0	0	0	0	0	0	0	0	0	0	0	0	0	0	0	0	0	0	0	0	0	0	0	0	0	0	0
Acidaminococcus_unclassified	283	0	0	0	0	0	27331	0	0	0	0	0	0	0	0	0	0	0	0	0	0	0	0	0	0	0	0	0	0	0
Eubacterium_rectale	157	0	0	0	0	0	1175278	0	0	0	0	0	435753	0	0	0	0	0	0	0	0	0	0	0	292932	0	0	0	0	0
Acinetobacter_unclassified	49	0	0	0	0	0	0	0	0	0	0	0	0	0	0	0	0	0	0	0	0	0	0	0	0	0	0	0	0	0
Clostridium_sp_7_3_54FAA	0	71020	0	0	0	0	0	0	0	0	0	0	0	0	0	0	0	0	0	0	0	0	0	0	0	0	0	0	0	0
Streptococcus_lutetiensis	0	285	0	0	0	0	0	0	0	0	0	0	0	0	0	0	0	0	0	0	0	0	0	0	0	0	0	0	0	0
Streptococcus_infantarius	0	19	0	0	0	0	0	0	0	0	0	0	0	0	0	0	0	0	0	0	0	0	0	0	0	0	0	0	0	0
Clostridium_glycolicum	0	0	194	756	864	1613	0	0	0	0	0	0	0	476	0	0	0	0	0	0	0	0	0	0	0	0	0	0	0	0
Collinsella_unclassified	0	0	0	0	0	224	0	0	0	0	0	0	0	0	0	0	0	0	0	0	0	0	0	0	0	0	0	0	0	0
Odoribacter_laneus	0	0	0	0	0	0	206988	4097	0	0	0	0	0	0	0	0	0	0	0	0	0	0	0	0	0	0	0	0	0	0
Methanobrevibacter_smithii	0	0	0	0	0	0	77680	0	0	0	0	0	0	0	0	0	0	0	0	0	0	0	0	0	0	0	0	0	0	0
Alistipes_sp_HGB5	0	0	0	0	0	0	112286	49424	34342	157951	29137	136736	0	0	0	0	0	0	0	0	0	0	0	0	0	0	0	0	0	0
Megamonas_unclassified	0	0	0	0	0	0	47308	40643	0	0	0	0	0	0	0	0	0	0	0	0	0	0	0	0	0	0	0	0	0	0
Alistipes_sp_AP11	0	0	0	0	0	0	54217	0	0	0	0	0	0	0	0	0	0	0	0	0	0	0	0	0	0	0	0	0	0	0
Bacteroides_coprocola	0	0	0	0	0	0	62811	899856	347137	1287714	991745	1085665	0	0	0	0	0	0	0	0	0	0	0	0	0	0	0	0	0	0
Bacteroidales_bacterium_ph8	0	0	0	0	0	0	38906	0	0	0	0	0	0	0	0	0	0	0	0	0	0	0	0	0	0	0	0	0	0	0
Megamonas_hypermegale	0	0	0	0	0	0	26449	20985	0	0	0	0	0	0	0	0	0	0	0	0	0	0	0	0	0	0	0	0	0	0
Megamonas_rupellensis	0	0	0	0	0	0	7351	5450	0	0	0	0	0	0	0	0	0	0	0	0	0	0	0	0	0	0	0	0	0	0
Bacteroides_plebeius	0	0	0	0	0	0	8973	7879	0	0	0	0	0	0	0	0	0	0	0	0	0	0	0	0	0	0	0	0	0	0
Blautia_hydrogenotrophica	0	0	0	0	0	0	6245	5775	0	318	0	221	2741	0	5634	0	2828	6998	0	0	0	0	0	0	0	0	0	0	0	0
Bacteroides_faecis	0	0	0	0	0	0	8964	48898	0	0	0	0	429	873	241	337	0	0	0	0	0	0	0	0	0	0	0	0	0	0
Alistipes_indistinctus	0	0	0	0	0	0	3209	3662	2547	9677	6082	7169	0	15046	1318	2168	2124	2304	0	0	0	0	0	0	0	0	0	0	0	0
Propionibacterium_freudenreichii	0	0	0	0	0	0	1873	0	0	0	0	0	0	0	0	0	0	0	0	0	0	0	0	0	0	0	0	0	0	0
Bacteroides_clarus	0	0	0	0	0	0	1830	209	0	1293	486	74	0	0	0	0	0	0	0	0	0	0	0	0	0	0	0	0	0	0
Bacteroides_finegoldii	0	0	0	0	0	0	2055	24458	0	36154	0	0	0	0	0	0	0	0	0	0	0	0	0	0	0	0	0	0	0	0
Alistipes_senegalensis	0	0	0	0	0	0	1529	810	257	1230	347	726	0	0	0	0	0	0	0	0	0	0	0	0	0	0	0	0	0	0
Megamonas_funiformis	0	0	0	0	0	0	575	502	0	0	0	0	0	0	0	0	0	0	0	0	0	0	0	0	0	0	0	0	0	0
Eubacterium_limosum	0	0	0	0	0	0	895	4897	6073	11173	3867	4160	0	0	18681	11790	23116	19178	0	0	0	0	0	0	0	0	0	0	0	0
Rothia_unclassified	0	0	0	0	0	0	474	0	0	0	0	0	0	0	0	0	0	0	0	0	0	0	0	0	0	0	0	0	0	0
Veillonella_dispar	0	0	0	0	0	0	342	0	0	0	0	0	0	0	0	0	0	0	0	0	0	0	0	0	303	0	0	0	0	0
Rothia_dentocariosa	0	0	0	0	0	0	261	0	0	0	0	0	0	0	0	0	0	0	0	0	0	0	0	0	0	0	0	0	0	0
Granulicatella_adiacens	0	0	0	0	0	0	132	0	0	0	0	0	0	0	0	0	0	0	0	0	0	0	0	0	0	0	0	0	0	0
Actinomyces_odontolyticus	0	0	0	0	0	0	72	0	0	0	0	0	0	0	0	0	0	0	0	0	0	0	0	0	0	0	0	0	0	0
Acidaminococcus_intestini	0	0	0	0	0	0	32	0	0	0	0	0	0	0	0	0	0	0	0	0	0	0	0	0	0	0	0	0	0	0
Bacteroides_nordii	0	0	0	0	0	0	0	4260	0	0	0	0	0	0	0	0	0	0	0	0	0	0	0	0	0	0	0	0	0	0
Bacteroides_fragilis	0	0	0	0	0	0	0	1542	0	0	0	0	255747	3148546	162800	172442	288982	210526	0	0	0	0	0	0	0	0	0	0	0	0
Comamonas_unclassified	0	0	0	0	0	0	0	0	0	0	0	899	0	0	0	0	0	0	0	0	0	0	0	0	0	0	0	0	0	0
Ruminococcus_callidus	0	0	0	0	0	0	0	0	0	0	0	0	24541	0	0	0	0	0	0	0	0	0	0	0	0	0	0	0	0	0
Bifidobacterium_pseudocatenulatum	0	0	0	0	0	0	0	0	0	0	0	0	15897	0	0	0	0	0	0	0	0	0	0	0	0	0	0	0	0	0
Slackia_piriformis	0	0	0	0	0	0	0	0	0	0	0	0	4735	0	0	0	0	0	0	0	0	0	0	0	0	0	0	0	0	0
Collinsella_tanakaei	0	0	0	0	0	0	0	0	0	0	0	0	5286	0	0	0	0	0	0	0	0	0	0	0	0	0	0	0	0	0
Bifidobacterium_adolescentis	0	0	0	0	0	0	0	0	0	0	0	0	3065	0	0	0	0	0	0	0	0	0	0	0	0	0	0	0	0	0
Murine_osteosarcoma_virus	0	0	0	0	0	0	0	0	0	0	0	0	1	0	0	0	0	0	0	0	0	0	0	0	0	0	0	0	0	0
Eubacterium_dolichum	0	0	0	0	0	0	0	0	0	0	0	0	671	0	0	0	0	0	0	0	0	0	0	0	0	0	0	0	0	0
Collinsella_stercoris	0	0	0	0	0	0	0	0	0	0	0	0	559	0	0	0	0	0	0	0	0	0	0	0	0	0	0	0	0	0
Bifidobacterium_bifidum	0	0	0	0	0	0	0	0	0	0	0	0	359	0	0	0	0	0	0	0	0	0	0	0	0	0	0	0	0	0
Gemella_haemolysans	0	0	0	0	0	0	0	0	0	0	0	0	78	0	0	0	0	0	0	0	0	0	0	0	0	0	0	0	0	0
Gemella_unclassified	0	0	0	0	0	0	0	0	0	0	0	0	16	0	0	0	0	0	0	0	0	0	0	0	0	0	0	0	0	0
Citrobacter_freundii	0	0	0	0	0	0	0	0	0	0	0	0	43	0	0	0	0	0	0	0	0	0	0	0	0	0	0	0	0	0
Clostridium_innocuum	0	0	0	0	0	0	0	0	0	0	0	0	0	37956	0	28691	5421	317	0	0	0	0	0	0	0	0	0	0	0	0
Phascolarctobacterium_succinatutens	0	0	0	0	0	0	0	0	0	0	0	0	0	0	0	0	0	0	0	0	0	0	0	0	194329	0	0	0	0	0
Catenibacterium_mitsuokai	0	0	0	0	0	0	0	0	0	0	0	0	0	0	0	0	0	0	0	0	0	0	0	0	19035	0	0	0	0	0
Bombyx_mori_nucleopolyhedrovirus	0	0	0	0	0	0	0	0	0	0	0	0	0	0	0	0	0	0	0	0	0	0	0	0	38	0	0	0	0	0
Streptococcus_gordonii	0	0	0	0	0	0	0	0	0	0	0	0	0	0	0	0	0	0	0	0	0	0	0	0	557	0	0	0	0	0
